# Supplementary material for: Transcriptomic effects of di-(2-ethylhexyl)-phthalate in Syrian hamster embryo cells: an important role of early cytoskeleton disturbances in carcinogenesis?
Source: Springer Nature journal article supplement (doi:10.1186/1471-2164-12-524), 2011-10-25
Supplement: Additional file 2 [file 1471-2164-12-524-s2.pdf]

|          |      | 24 HOURS |          |              |             |             |
|----------|------|----------|----------|--------------|-------------|-------------|
|          |      | Control  | DEHP 0µM | DEHP 12.5 µM | DEHP 25µM   | DEHP 50 µM  |
| Thbs1    | DD   |          | =        | =            | -           | -           |
|          | qPCR | 1.0      | 1.0      | 1.0          | 0.6         | <b>0.3</b>  |
| Col1a1   | DD   |          | =        | +            | +           | +           |
|          | qPCR | 1.0      | 1.0      | 1.4          | 1.4         | <b>2.1</b>  |
| Thy1     | DD   |          | =        | =            | =           | -           |
|          | qPCR | 1.0      | 1.0      | 0.8          | 0.7         | 0.6         |
| Tub2b    | DD   |          | =        | =            | +           | +           |
|          | qPCR | 1.0      | 1.0      | 1.2          | 1.6         | 1.8         |
| Flrt2    | DD   |          | =        | =            | =           | -           |
|          | qPCR | 1.0      | 1.0      | 0.8          | 0.7         | <b>0.4</b>  |
| Crip1    | DD   |          | =        | +            | +           | +           |
|          | qPCR | 1.0      | 1.0      | 1.7          | <b>2.1</b>  | <b>2.3</b>  |
| Cdh3     | DD   |          | =        | =            | -           | -           |
|          | qPCR | 1.0      | 1.0      | <b>0.4</b>   | <b>0.4</b>  | <b>0.3</b>  |
| Actin    | DD   |          | =        | =            | =           | +           |
|          | qPCR | 1.0      | 1.0      | 1.1          | 1.1         | 1.4         |
| Coro1C   | DD   |          | =        | =            | =           | +           |
|          | qPCR | 1.0      | 1.0      | 1.1          | 1.5         | <b>2.5</b>  |
| Kif23    | DD   |          | =        | ++           | ++          | ++          |
|          | qPCR | 1.0      | 1.0      | 1.1          | <b>16.4</b> | <b>16.6</b> |
| Has2     | DD   |          | =        | =            | =           | -           |
|          | qPCR | 1.0      | 1.0      | 1.0          | 0.7         | <b>0.2</b>  |
| Calml3   | DD   |          | =        | +            | +           | +           |
|          | qPCR | 1.0      | 1.0      | <b>2.7</b>   | <b>4.4</b>  | <b>4.5</b>  |
| Dclk     | DD   |          | =        | +            | +           | +           |
|          | qPCR | 1.0      | 1.0      | 1.4          | <b>2.9</b>  | <b>3.3</b>  |
| Enah     | DD   |          | =        | =            | =           | -           |
|          | qPCR | 1.0      | 0.9      | 0.6          | 0.7         | <b>0.4</b>  |
| PlekHa5  | DD   |          | =        | =            | =           | +           |
|          | qPCR | 1.0      | 1.0      | 1.0          | 1.3         | 1.8         |
| Ctnnbip1 | DD   |          | =        | -            | -           | -           |
|          | qPCR | 1.0      | 1.1      | <b>0.4</b>   | <b>0.5</b>  | 0.7         |
| Cttnbp2  | DD   |          | =        | =            | +           | +           |
|          | qPCR | 1.0      | 1.1      | 1.2          | 1.4         | <b>2.3</b>  |
| Lrrc8A   | DD   |          | =        | =            | =           | -           |
|          | qPCR | 1.0      | 1.1      | 1.1          | 1.0         | <b>0.4</b>  |
| Snx6     | DD   |          | =        | =            | =           | -           |
|          | qPCR | 1.0      | 1.0      | 1.0          | 0.9         | <b>0.5</b>  |
| Nrp2     | DD   |          | =        | -            | -           | -           |
|          | qPCR | 1.0      | 1.0      | 0.8          | <b>0.4</b>  | <b>0.2</b>  |
| Nid2     | DD   |          | =        | =            | =           | -           |
|          | qPCR | 1.0      | 1.0      | 1.0          | 0.7         | 0.7         |

S3: The DEHP effect is identified by (+) for 2.0-fold overexpression, (++) for 10-fold overexpression, (-) for 2.0-fold underexpression and (--) for 10.0-fold underexpression for Differential Display and corresponds to the ratio of bands intensity compared to the control on the gel using an image analysis software (QuantityOne® 1-D analysis software BioRad, Marne-la-Coquette, France). For qPCR, the values represent the  $\Delta\Delta C_t$  score normalized by gapdh mRNA level after analysis with StepOne and DataAssist (Roche Applied Biosystem,; Courtaboeuf, France). This table showed that 75% of genes identified by DD are confirmed in qPCR.
